# Supplementary material for: Tree Species Drive the Diversity of Epiphytic Bryophytes in the Alpine Forest Ecosystem: A Case Study in Tibet
Source: MDPI journal article supplement (doi:10.3390/f13122154), 2022-12-15
Supplement: s1 [file s1]

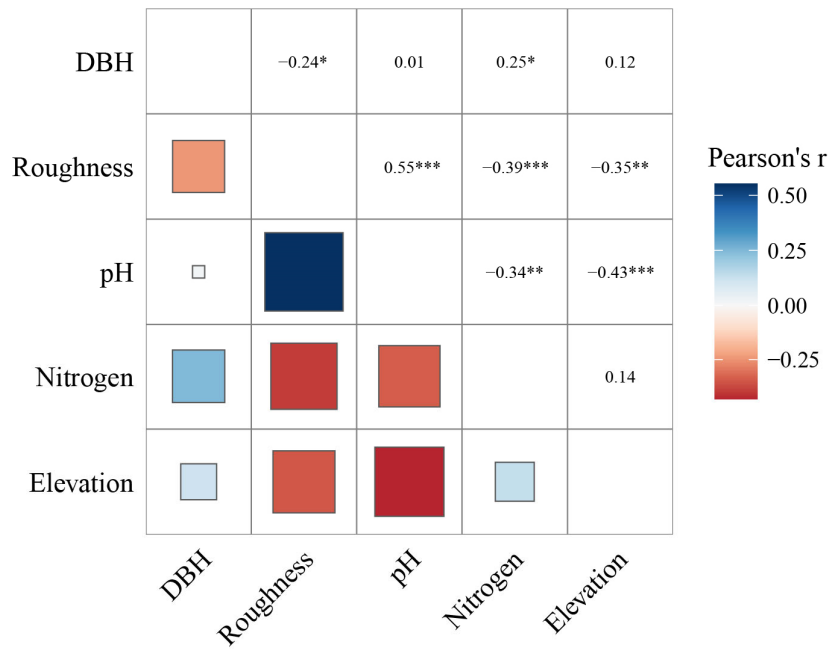

**Figure S1.** Correlations with environmental factors. Pairwise comparisons of environmental factors are shown, with a color gradient denoting Pearson's correlation coefficient. pH, potential of hydrogen; DBH, diameter at breast height. \*,  $0.01 < p \leq 0.05$ ; \*\*,  $0.001 < p \leq 0.01$ ; \*\*\*,  $p \leq 0.001$ .

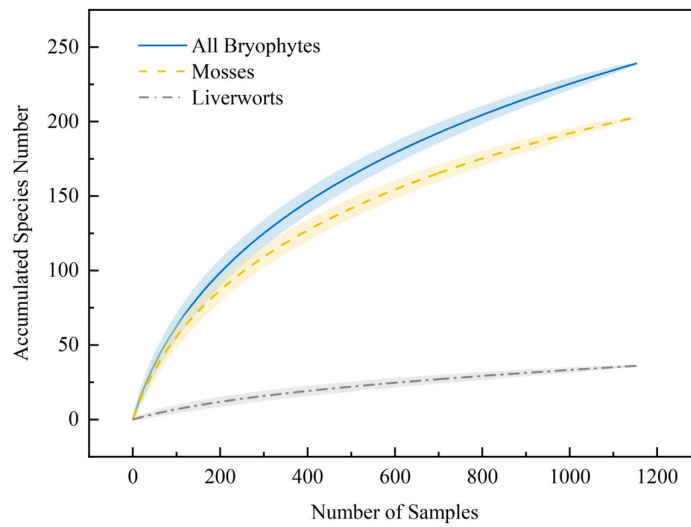

**Figure S2.** Richness (y-axis) as the species accumulation curve for the number of sample squares (x-axis), pooled in random order. Color stripe represents error.

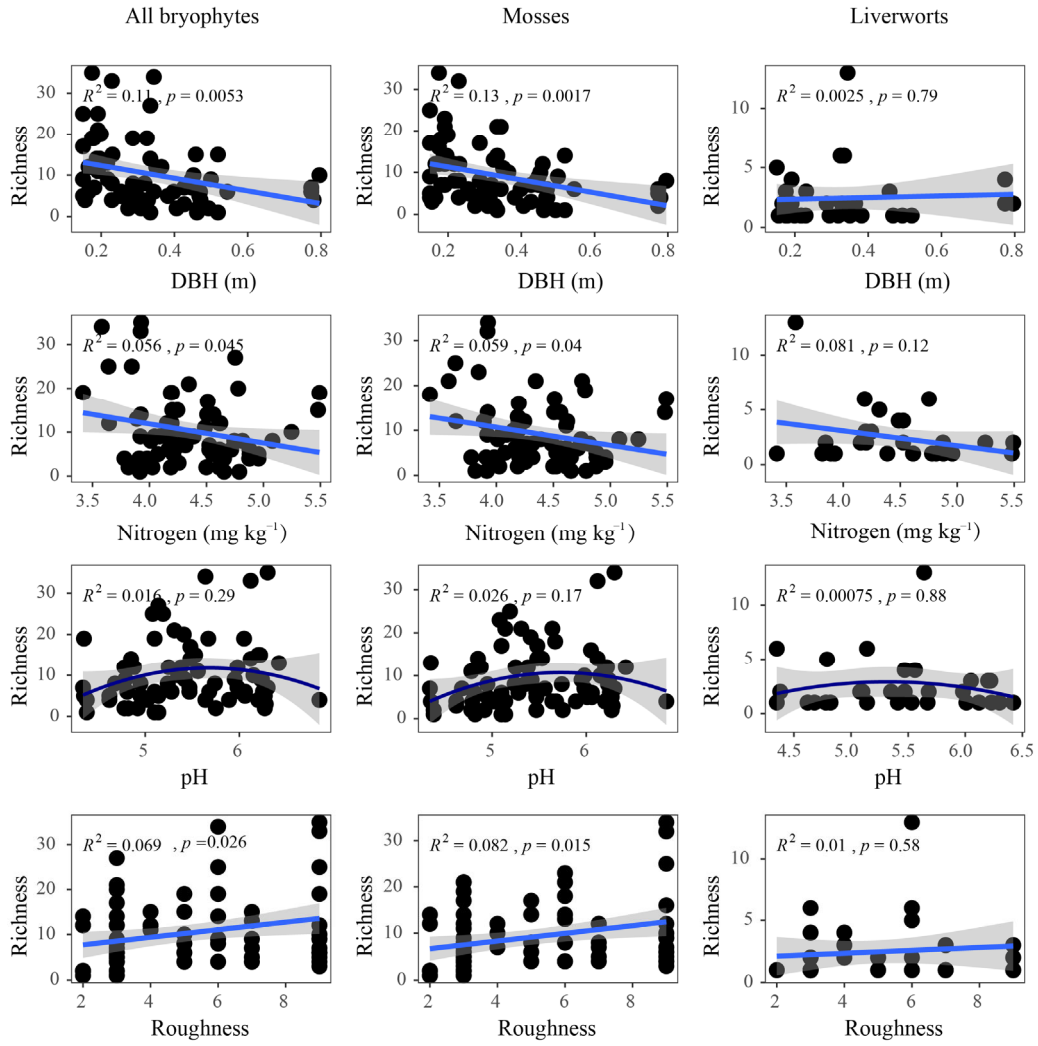

**Figure S3.** Relationships between tree properties (tree nitrogen of barks, pH, DBH, and roughness) and the richness of all bryophytes, mosses, and liverworts based on 72 trees. Different lines represent the environmental conditions: DBH, nitrogen, pH, roughness. Different columns represent type: all bryophytes, mosses, and liverworts. pH, potential of hydrogen; DBH, diameter at breast height.

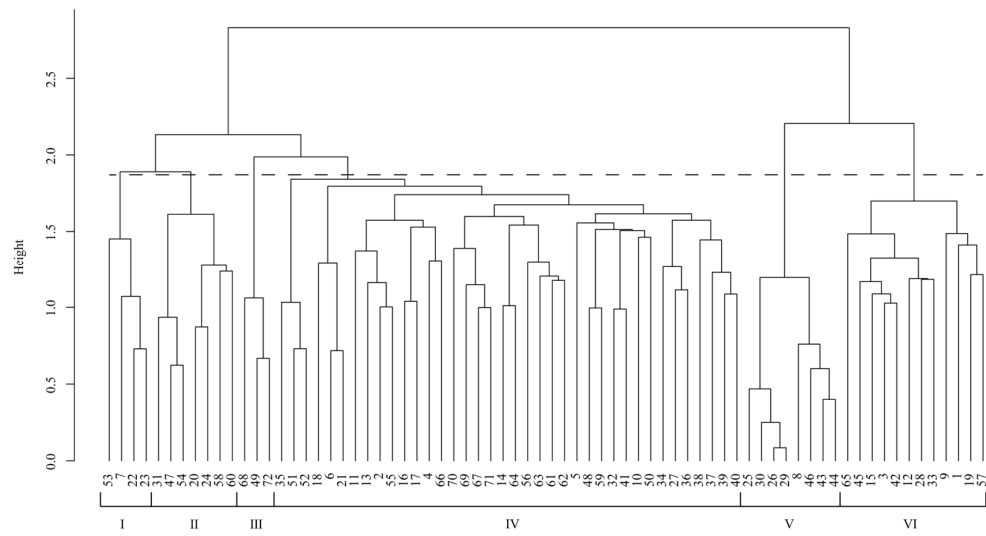

**Figure S4.** Results of cluster analysis (classification) on species composition data (437 species in total) from the 72 trees (based on the Bray-Curtis similarity measure); bryophyte assemblages that are most similar cluster together and six clusters are identified (I - VI).

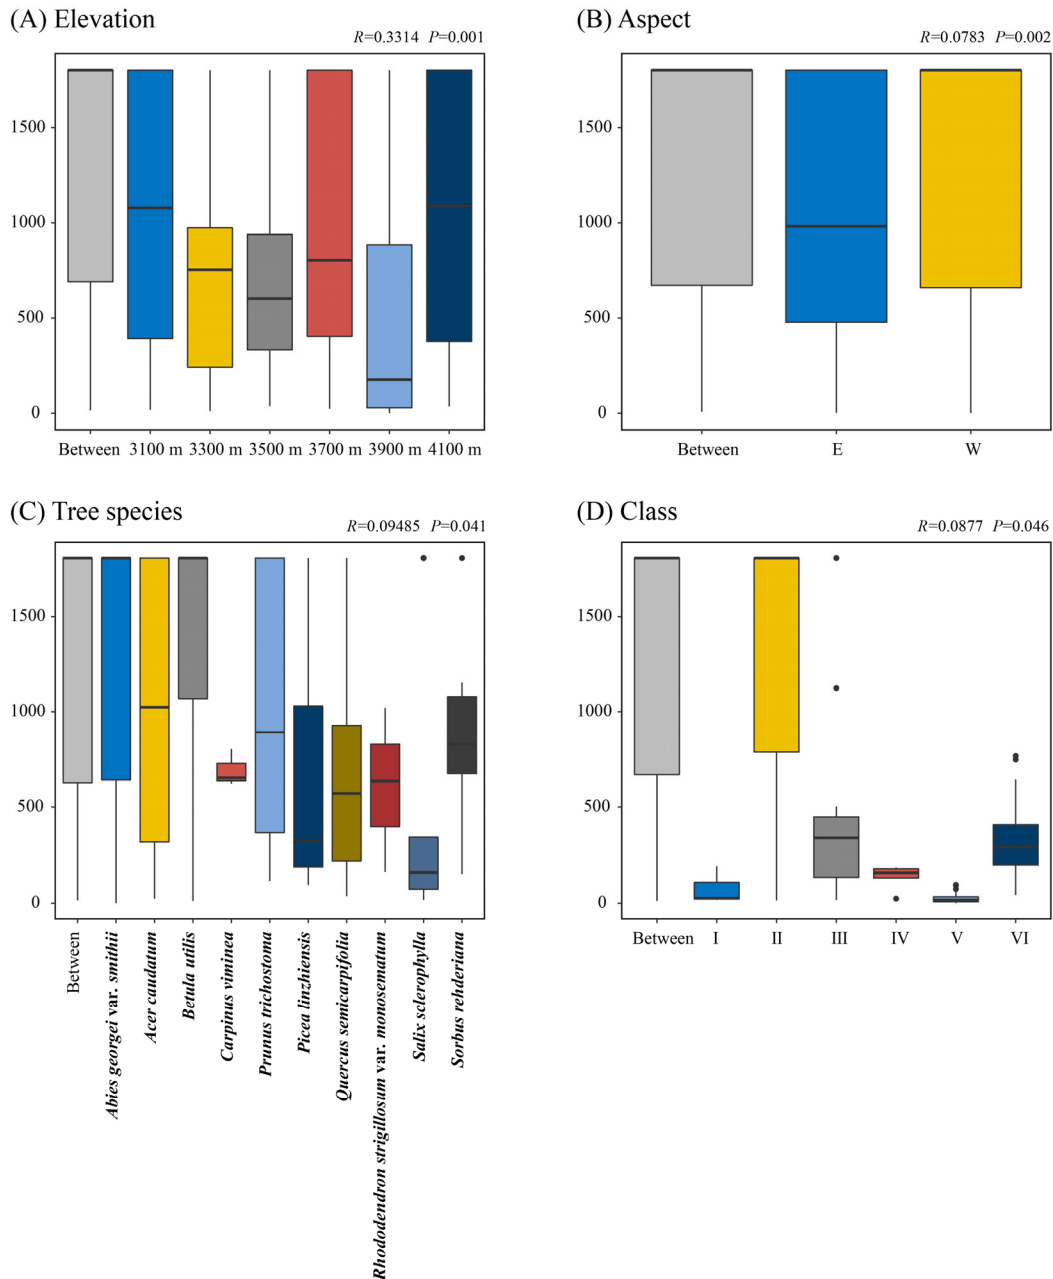

**Figure S5.** Results of dissimilarities between bryophyte assemblage composition from the 72 trees (based on the Bray-Curtis similarity measure) using analyses of similarity (ANOSIM). (A) based on dissimilarities among different elevation; (B) based on dissimilarities among different aspect; (C) based on dissimilarities among different tree species; (D) based on dissimilarities among different class (shown as letters I - VI corresponding to their classification). Outliers are values that do not fall within 1.5 times the interquartile range of the first and third quartiles (indicated by the whiskers). In each box, the horizontal black line represents the median.

**Table S1.** Species of epiphytic bryophytes.

| No. | Species                                                                | No. | Species                                                                 |
|-----|------------------------------------------------------------------------|-----|-------------------------------------------------------------------------|
| 1   | <i>Acrolejeunea sandvicensis</i> (Gottsche) Steph.                     | 39  | <i>Bryoerythrophyllum recurvirostrum</i> (Hedw.) P. C. Chen             |
| 2   | <i>Actinothuidium hookeri</i> (Mitt.) Broth.                           |     |                                                                         |
| 3   | <i>Amblystegium serpens</i> (Hedw.) Schimp.                            | 40  | <i>Bryoerythrophyllum yunnanense</i> (Herzog) P. C. Chen                |
| 4   | <i>Anastrepta orcadensis</i> (Hook.) Schiffn.                          |     |                                                                         |
| 5   | <i>Anoetangium thomsonii</i> Mitt.                                     | 41  | <i>Bryonoguchia molkenboeri</i> (Sande Lac.) Z. Iwats. & Inoue          |
| 6   | <i>Apometzgeria pubescens</i> (Schränk) Kuwah.                         | 42  | <i>Campylopus sublatus</i> Schimp.                                      |
| 7   | <i>Atrichum rhystophyllum</i> (Müll. Hal.) Paris                       | 43  | <i>Cephalozia leucantha</i> Spruce                                      |
| 8   | <i>Blepharostoma minus</i> Horik.                                      |     |                                                                         |
| 9   | <i>Blepharostoma trichophyllum</i> (L.) Dumort.                        | 44  | <i>Chiloscyphus minor</i> (Nees) J. J. Engel & R. M. Schust.            |
| 10  | <i>Brachythecium amnicola</i> Müll. Hal.                               |     |                                                                         |
| 11  | <i>Brachythecium brotheri</i> Paris                                    | 45  | <i>Cirriphyllum cirrosum</i> (Schwägr.) Grout                           |
| 12  | <i>Brachythecium buchananii</i> (Hook.) A. Jaeger                      | 46  | <i>Cirriphyllum piliferum</i> (Hedw.) Grout                             |
| 13  | <i>Brachythecium coreanum</i> Cardot                                   | 47  | <i>Claopodium assurgens</i> (Sull. & Lesq.) Cardot                      |
| 14  | <i>Brachythecium erythrorrhizon</i> Schimp.                            |     |                                                                         |
| 15  | <i>Brachythecium fasciculirameum</i> Müll. Hal.                        | 48  | <i>Cynodontium gracilescens</i> (F. Weber & D. Mohr) Schimp.            |
| 16  | <i>Brachythecium piligerum</i> Cardot                                  | 49  | <i>Diaphanodon blandus</i> Renaud & Cardot                              |
| 17  | <i>Brachythecium planiusculum</i> Müll. Hal.                           | 50  | <i>Dicranella amplexans</i> Jaeger                                      |
| 18  | <i>Brachythecium plumosum</i> (Hedw.) Schimp.                          | 51  | <i>Dicranodontium caespitosum</i> (Mitt.) Paris                         |
| 19  | <i>Brachythecium populeum</i> (Hedw.) Schimp.                          | 52  | <i>Dicranodontium denudatum</i> (Brid.) E. Britton                      |
| 20  | <i>Brachythecium procumbens</i> (Mitt.) A. Jaeger                      | 53  | <i>Dicranodontium didymodon</i> Paris                                   |
| 21  | <i>Brachythecium pulchellum</i> Broth. & Paris                         | 54  | <i>Dicranodontium subintegrifolium</i> Broth.                           |
| 22  | <i>Brachythecium rotaceum</i> De Not.                                  | 55  | <i>Dicranum drummondii</i> Müll. Hal.                                   |
| 23  | <i>Brachythecium rutabulum</i> (Hedw.) Schimp.                         | 56  | <i>Dicranum flagellare</i> Hedw.                                        |
| 24  | <i>Brachythecium salebrosum</i> (Hoffm. ex F. Weber & D. Mohr) Schimp. | 57  | <i>Dicranum fuscescens</i> Turner                                       |
| 25  | <i>Brachythecium thraustum</i> Müll. Hal.                              | 58  | <i>Dicranum japonicum</i> Mitt.                                         |
| 26  | <i>Brachythecium uncinifolium</i> Broth. & Paris                       | 59  | <i>Didymodon constrictus</i> var. <i>flexicuspis</i> (P. C. Chen) Saito |
| 27  | <i>Brachythecium velutinum</i> (Hedw.) Schimp.                         | 60  | <i>Didymodon japonicus</i> K. Saito                                     |
| 28  | <i>Brachythecium viridefactum</i> Müll. Hal.                           | 61  | <i>Drepanocladus aduncus</i> (Hedw.) Warnst.                            |
| 29  | <i>Brachythecium novae-angliae</i> (Sull. & Lesq.) A. Jaeger           | 62  | <i>Ectropothecium wangianum</i> P. C. Chen                              |
| 30  | <i>Brothera leana</i> (Sull.) Müll. Hal.                               | 63  | <i>Entodon cladorrhizans</i> (Hedw.) Müll. Hal.                         |
| 31  | <i>Brotherella erythrocaulis</i> (Mitt.) M. Fleisch.                   | 64  | <i>Entodon concinnus</i> (De Not.) Paris                                |
| 32  | <i>Brotherella fauriei</i> (Cardot) Broth.                             | 65  | <i>Entodon longifolius</i> (Müll. Hal.) A. Jaeger                       |
| 33  | <i>Brotherella nictans</i> (Mitt.) Broth.                              | 66  | <i>Entodon luridus</i> (Griff.) A. Jaeger                               |
| 34  | <i>Bryhnia novae-angliae</i> (Sull. & Lesq.) Grout                     | 67  | <i>Entodon macropodus</i> (Hedw.) Müll. Hal.                            |
| 35  | <i>Bryhnia trichomitria</i> Dixon & Thér.                              | 68  | <i>Entodon pylaisioides</i> R. L. Hu & Y. F. Wang                       |
| 36  | <i>Bryoerythrophyllum alpinum</i> (Vent.) P. C. Chen                   | 69  | <i>Entodon schensianus</i> Müll. Hal.                                   |
| 37  | <i>Bryoerythrophyllum ferruginascens</i> (Stirt.) Giacom.              | 70  | <i>Entodon sullivantii</i> (Müll. Hal.) Lindb.                          |
| 38  | <i>Bryoerythrophyllum gymnostomum</i> (Broth.) P. C. Chen              | 71  | <i>Entodon viridulus</i> Cardot                                         |
|     |                                                                        | 72  | <i>Eurhynchium angustirete</i> (Broth.) T. J. Kop.                      |
|     |                                                                        | 73  | <i>Eurhynchium coarctum</i> Müll. Hal.                                  |
|     |                                                                        | 74  | <i>Eurhynchium eustegium</i> (Besch.) Dixon                             |

| No. | Species                                                            | No. | Species                                                                  |
|-----|--------------------------------------------------------------------|-----|--------------------------------------------------------------------------|
| 75  | <i>Eurhynchium kirishimense</i> Takaki                             | 116 | <i>Isopterygium albescent</i> (Hook.) A. Jaeger                          |
| 76  | <i>Eurhynchium savatieri</i> Schimp. ex Besch.                     | 117 | <i>Isopterygium minutirameum</i> (Müll. Hal.) A. Jaeger                  |
| 77  | <i>Floribundaria setschwanica</i> Broth.                           | 118 | <i>Kindbergia arbuscula</i> (Broth.) Ochyra                              |
| 78  | <i>Forsstroemia yezoana</i> (Besch.) S. Olsson, Enroth & D. Quandt | 119 | <i>Lejeunea subacuta</i> Mitt.                                           |
| 79  | <i>Frullania bolanderi</i> Austin                                  | 120 | <i>Lepidozia reptans</i> (L.) Dumort.                                    |
| 80  | <i>Frullania fuscovirens</i> Steph.                                | 121 | <i>Leptodontium flexifolium</i> (Dicks.) Hampe                           |
| 81  | <i>Frullania inouei</i> S. Hatt.                                   | 122 | <i>Leptodontium handelii</i> Thér.                                       |
| 82  | <i>Frullania pallidevirens</i> Steph.                              | 123 | <i>Lescurea incurvata</i> (Hedw.) E. Lawton                              |
| 83  | <i>Frullania parvistipula</i> Steph.                               | 124 | <i>Lescurea radicata</i> (Mitt.) Mönk.                                   |
| 84  | <i>Frullania physantha</i> Mitt.                                   | 125 | <i>Leskea polycarpa</i> Ehrh. ex Hedw.                                   |
| 85  | <i>Frullania schensiana</i> C. Massal.                             | 126 | <i>Leucodon exaltatus</i> Müll. Hal.                                     |
| 86  | <i>Frullania sinensis</i> Steph.                                   | 127 | <i>Leucodon secundus</i> var. <i>strictus</i> (Harv.) Akiyama            |
| 87  | <i>Frullania yunnanensis</i> Steph.                                | 128 | <i>Lewinskya brassii</i> (E. B. Bartram) F. Lara, Garilleti & Goffinet   |
| 88  | <i>Frullania zangii</i> S. Hatt. & P. J. Lin                       | 129 | <i>Lewinskya dasymitria</i> (Lewinsky) F. Lara, Garilleti & Goffinet     |
| 89  | <i>Gammiella pterogonioides</i> Broth.                             | 130 | <i>Lewinskya hookeri</i> (Wilson ex Mitt.) F. Lara, Garilleti & Goffinet |
| 90  | <i>Gollania clarescens</i> (Mitt.) Broth.                          | 131 | <i>Lewinskya sordida</i> (Sull. & Lesq.) F. Lara, Garilleti & Goffinet   |
| 91  | <i>Gollania cylindricarpa</i> (Mitt.) Broth.                       | 132 | <i>Lewinskya speciosa</i> (Nees) F. Lara, Garilleti & Goffinet           |
| 92  | <i>Haplocladium angustifolium</i> (Hampe & Müll. Hal.) Broth.      | 133 | <i>Lindbergia brachyptera</i> (Mitt.) Kindb.                             |
| 93  | <i>Haplocladium microphyllum</i> (Hedw.) Broth.                    | 134 | <i>Lindbergia brevifolia</i> (C. Gao) C. Gao                             |
| 94  | <i>Herbertus dicranus</i> (Taylor) Trevis.                         | 135 | <i>Lindbergia serrulatus</i> (C. Gao) C. Gao                             |
| 95  | <i>Herzogiella perrobusta</i> (Broth. ex Cardot) Z. Iwats.         | 136 | <i>Lophozia lacerata</i> Kitag.                                          |
| 96  | <i>Herzogiella seligeri</i> (Brid.) Z. Iwats.                      | 137 | <i>Lophozia wenzelii</i> (Nees) Steph.                                   |
| 97  | <i>Herzogiella striatella</i> (Brid.) Z. Iwats.                    | 138 | <i>Macromitrium ferriei</i> Cardot & Thér.                               |
| 98  | <i>Heterophyllum affine</i> M. Fleisch.                            | 139 | <i>Meteorium subpolytrichum</i> Broth.                                   |
| 99  | <i>Homomallium simlaense</i> (Mitt.) Broth.                        | 140 | <i>Neckera borealis</i> Nog.                                             |
| 100 | <i>Homomallium yuennanense</i> Broth.                              | 141 | <i>Neckera decurrens</i> Broth.                                          |
| 101 | <i>Hylocomium splendens</i> (Hedw.) Schimp.                        | 142 | <i>Neckera humilis</i> Mitt.                                             |
| 102 | <i>Hypnum calcicola</i> Ando                                       | 143 | <i>Neckera laevidens</i> Broth. ex P. C. Wu & Y. Jia                     |
| 103 | <i>Hypnum callichroum</i> Brid.                                    | 144 | <i>Neckera pennata</i> Hedw.                                             |
| 104 | <i>Hypnum circinale</i> Hook.                                      | 145 | <i>Neobarbella comes</i> Nog.                                            |
| 105 | <i>Hypnum cupressiforme</i> L. ex Hedw.                            | 146 | <i>Neodiciadiella pendula</i> W. R. Buck                                 |
| 106 | <i>Hypnum densirameum</i> Ando                                     | 147 | <i>Oncophorus virens</i> Brid.                                           |
| 107 | <i>Hypnum fertile</i> Sendtn.                                      | 148 | <i>Oncophorus wahlenbergii</i> Brid.                                     |
| 108 | <i>Hypnum fujiyamae</i> (Broth.) Paris                             | 149 | <i>Oreoweisia weisioides</i> Broth.                                      |
| 109 | <i>Hypnum hamulosum</i> Schimp.                                    | 150 | <i>Orthoamblystegium spuriosubtile</i> (Broth. & Paris) Kanda & Nog.     |
| 110 | <i>Hypnum pallescens</i> (Hedw.) P. Beauv.                         | 151 | <i>Orthodicranum flagellare</i> (Hedw.) Loesk.                           |
| 111 | <i>Hypnum plumaeforme</i> Wilson                                   |     |                                                                          |
| 112 | <i>Hypnum revolutum</i> (Mitt.) Lindb.                             |     |                                                                          |
| 113 | <i>Hypnum subimponens</i> Lesq.                                    |     |                                                                          |
| 114 | <i>Hypnum vaucheri</i> Lesq.                                       |     |                                                                          |
| 115 | <i>Isopterygiopsis pulchella</i> (Hedw.) Z. Iwats.                 |     |                                                                          |

| No. | Species                                                                                 | No. | Species                                                            |
|-----|-----------------------------------------------------------------------------------------|-----|--------------------------------------------------------------------|
| 152 | <i>Orthotrichum callistomum</i> Fisch.-Oost. ex Bruch & Schimp.                         | 192 | <i>Pylaisia levieri</i> (Müll. Hal.) Arikawa                       |
| 153 | <i>Orthotrichum ibukiense</i> Toyama                                                    | 193 | <i>Pylaisia polyantha</i> (Hedw.) Schimp.                          |
| 154 | <i>Orthotrichum revolutum</i> Müll. Hal.                                                | 194 | <i>Pylaisiadelpha yokohamae</i> (Broth.) W. R. Buck                |
| 155 | <i>Pallavicinia lyellii</i> (Hook.) Gray                                                | 195 | <i>Radula lindenbergiana</i> Gottsche ex Hartm.                    |
| 156 | <i>Paraleucobryum enerve</i> (Thed.) Loeske                                             | 196 | <i>Regmatodon longinervis</i> C. Gao                               |
| 157 | <i>Plagiochila biondiana</i> C. Massal.                                                 | 197 | <i>Rhodobryum ontariense</i> Kindb.                                |
| 158 | <i>Plagiochila duthiana</i> Steph.                                                      | 198 | <i>Rhynchostegium fauriei</i> Cardot                               |
| 159 | <i>Plagiochila erlangensis</i> M. L. So                                                 | 199 | <i>Rhynchostegium pallenticaula</i> Müll. Hal.                     |
| 160 | <i>Plagiomnium arbusculum</i> T. J. Kop                                                 | 200 | <i>Rhynchostegium pallidifolium</i> (Mitt.) A. Jaeger              |
| 161 | <i>Plagiomnium cuspidatum</i> T. J. Kop.                                                | 201 | <i>Rhynchostegium serpenticaula</i> (Müll. Hal.) Broth.            |
| 162 | <i>Plagiomnium medium</i> T. J. Kop.                                                    | 202 | <i>Rhytidium rugosum</i> (Hedw.) Kindb.                            |
| 163 | <i>Plagiomnium vesicatum</i> T. J. Kop.                                                 | 203 | <i>Sanionia uncinata</i> (Hedw.) Loeske                            |
| 164 | <i>Plagiomnium affine</i> (Blandow ex Funck) T.J. Kop.                                  | 204 | <i>Scapania apiculata</i> Spruce                                   |
| 165 | <i>Plagiothecium handelii</i> Broth.                                                    | 205 | <i>Scapania gaochii</i> X. Fu ex T. Cao                            |
| 166 | <i>Plagiothecium laetum</i> Schimp.                                                     | 206 | <i>Scapania nemorea</i> (L.) Grolle                                |
| 167 | <i>Plagiothecium latebricola</i> Schimp.                                                | 207 | <i>Scapania nepalensis</i> Nees                                    |
| 168 | <i>Plagiothecium neckeroideum</i> Schimp.                                               | 208 | <i>Scapania orientalis</i> Steph. ex K. Müll.                      |
| 169 | <i>Plagiothecium nemorale</i> (Mitt.) A. Jaeger                                         | 209 | <i>Scapania verrucosa</i> Heeg                                     |
| 170 | <i>Plagiothecium piliferum</i> (Sw.) Schimp.                                            | 210 | <i>Schwetschkeopsis formosana</i> Nog.                             |
| 171 | <i>Platydictya jungermannioides</i> (Brid.) Crum                                        | 211 | <i>Sciuro-hypnum plumosum</i> (Hedw.) Ignatov & Huttunen.          |
| 172 | <i>Platygyriella aurea</i> W. R. Buck                                                   | 212 | <i>Sciuro-hypnum reflexum</i> (Starke) Ignatov & Huttunen.         |
| 173 | <i>Platygyrium repens</i> (Brid.) Schimp.                                               | 213 | <i>Sematophyllum phoeniceum</i> (Müll. Hal.) M. Fleisch.           |
| 174 | <i>Pohlia cruda</i> (Hedw.) Lindb.                                                      | 214 | <i>Sematophyllum subhumile</i> (Müll. Hal.) M. Fleisch.            |
| 175 | <i>Pohlia crudoides</i> Broth.                                                          | 215 | <i>Symblepharis reinwardtii</i> (Dozy & Molk.) Mitt.               |
| 176 | <i>Pohlia drummondii</i> Andr.                                                          | 216 | <i>Symblepharis vaginata</i> (Hook.) Wijk & Marg.                  |
| 177 | <i>Pohlia elongata</i> Hedw.                                                            | 217 | <i>Syntrichia sinensis</i> Ochyra                                  |
| 178 | <i>Pohlia longicolla</i> (Hedw.) Lindb.                                                 | 218 | <i>Tayloria indica</i> Mitt.                                       |
| 179 | <i>Pohlia lutescens</i> (Limpr.) H. Lindb.                                              | 219 | <i>Tayloria serrata</i> (Hedw.) Bruch & Schimp.                    |
| 180 | <i>Pohlia macrocarpa</i> Da C. Zhang, X. J. Li & Higuchi                                | 220 | <i>Thuidium cymbifolium</i> (Dozy & Molk.) Dozy & Molk.            |
| 181 | <i>Pohlia laticuspes</i> P. C. Chen ex Redf. et Tan                                     | 221 | <i>Thuidium plumulosum</i> (Dozy & Molk.) Dozy & Molk.             |
| 182 | <i>Pseudokindbergia dumosa</i> (Mitt.) M. Li, Y.F. Wang, B.C. Tan & Ignatov, comb. nov. | 222 | <i>Thuidium tamariscinum</i> (Hedw.) Schimp.                       |
| 183 | <i>Pseudoleskeella catenulata</i> (Brid. ex Schrad.) Kindb.                             | 223 | <i>Tortella fragilis</i> (Hook. & Wilson) Limpr.                   |
| 184 | <i>Pseudoleskeella tectorum</i> (Brid.) Kindb.                                          | 224 | <i>Trachyphyllum inflexum</i> (Harv.) A. Gepp                      |
| 185 | <i>Pseudolophozia sudetica</i> (Nees ex Huebener) Konstant. & Vilnet                    | 225 | <i>Trichostomum brachydontium</i> Bruch                            |
| 186 | <i>Ptilium crista-castrensis</i> (Hedw.) De Not.                                        | 226 | <i>Trichostomum hattorianum</i> B. C. Tan & Z. Iwats.              |
| 187 | <i>Ptychomitrium gardneri</i> Lesq.                                                     | 227 | <i>Trichostomum tenuirostre</i> Lindb.                             |
| 188 | <i>Pylaisia brotheri</i> Besch.                                                         | 228 | <i>Tritomaria exsecta</i> (Schmidel ex Schrad.) Schiffn. ex Loeske |
| 189 | <i>Pylaisia cristata</i> Cardot                                                         | 229 | <i>Ullota crispa</i> Brid.                                         |
| 190 | <i>Pylaisia extenta</i> Jaeger                                                          |     |                                                                    |
| 191 | <i>Pylaisia falcata</i> Schimp.                                                         |     |                                                                    |

| No. | Species                                                  | No. | Species                                                     |
|-----|----------------------------------------------------------|-----|-------------------------------------------------------------|
| 230 | <i>Ullota gigantospora</i> F. Lara, Caparrós & Garilleti | 234 | <i>Zygodon brevisetus</i> Wilson ex Mitt.                   |
| 231 | <i>Ullota reptans</i> Mitt.                              | 235 | <i>Zygodon reinwardtii</i> Braun                            |
| 232 | <i>Ullota robusta</i> Mitt.                              | 236 | <i>Zygodon viridissimus</i> var. <i>rupestris</i> Hartm.    |
| 233 | <i>Ullota yunnanensis</i> F. Lara, Caparrós & Garilleti  | 237 | <i>Zygodon viridissimus</i> var. <i>dentatus</i> Limpricht. |

**Table S2.** Relative coverage, relative frequency, and importance values of dominant species in different classes.

| Class | Dominant species                  | Relative coverage | Relative frequency | Important value |
|-------|-----------------------------------|-------------------|--------------------|-----------------|
| I     | <i>Pseudoleskeella tectorum</i>   | 0.4567            | 0.1667             | 0.3117          |
|       | <i>Entodon sullivantii</i>        | 0.1701            | 0.0556             | 0.1129          |
| II    | <i>Trichostomum tenuirostre</i>   | 0.0471            | 0.0231             | 0.0351          |
|       | <i>Hypnum plumaeforme</i>         | 0.0438            | 0.0205             | 0.0322          |
| III   | <i>Thuidium plumulosum</i>        | 0.2586            | 0.0469             | 0.1528          |
|       | <i>Entodon concinnus</i>          | 0.1699            | 0.0938             | 0.1318          |
| IV    | <i>Thuidium cymbifolium</i>       | 0.4699            | 0.1333             | 0.3016          |
|       | <i>Meteorium subpolytrichum</i>   | 0.0880            | 0.0333             | 0.0607          |
| V     | <i>Ptilium crista-castrensis</i>  | 0.5897            | 0.1778             | 0.3837          |
|       | <i>Thuidium cymbifolium</i>       | 0.1675            | 0.1111             | 0.1393          |
| VI    | <i>Ptilium crista-castrensis</i>  | 0.2311            | 0.0632             | 0.1471          |
|       | <i>Floribundaria setschwanica</i> | 0.0741            | 0.0105             | 0.0423          |
